# Supplementary material for: Spin pairing, electrostatic and dipolar interactions influence stacking of radical anions in alkali salts of 4,5-dichloro-3,6-dioxocyclohexa-1,4-diene-1,2-dicarbonitrile (DDQ)
Source: Royal Society of Chemistry journal article supplement (doi:10.1039/c7ce00261k), 2017-01-01
Supplement: c7ce00261k1.pdf [file c7ce00261k1.pdf]

# Spin pairing, electrostatic and dipolar interactions shape stacking of radical anions in alkali salts of 4,5-dichloro-3,6-dioxocyclohexa-1,4-diene-1,2-dicarbonitrile (DDQ)

## Supplementary Data

Krešimir Molčanov and Biserka Kojić-Prodić

Rudjer Bošković Institute, Bijenička 54, HR-10000 Zagreb, Croatia

e-mail: kmolcano@irb.hr

**S1 ORTEP drawings of DDQ anions**

**S2 Details on metal coordinations**

**S3 Crystal packing of compounds 1-5**

**S1 ORTEP drawings of DDQ anions**

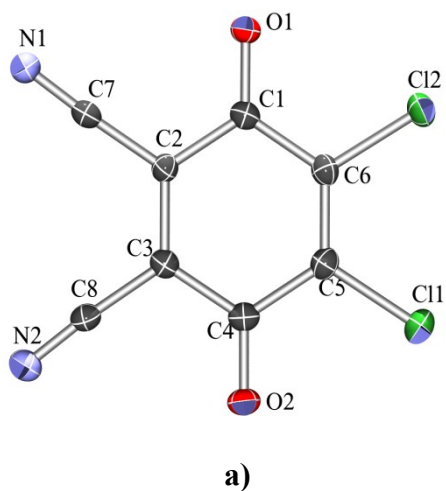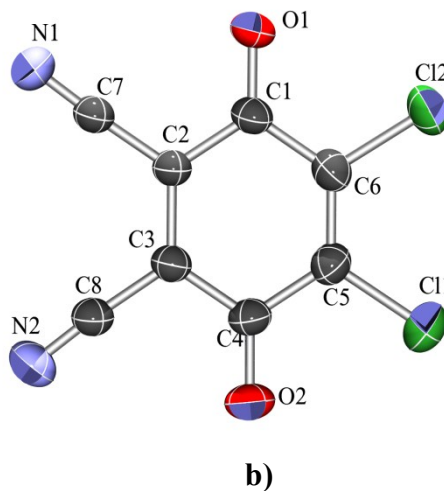

**Figure S1** ORTEP-3 drawings of DDQ anion in **1** at a) 120 K and b) room temperature. Displacement ellipsoids are drawn for the probability of 50 %.

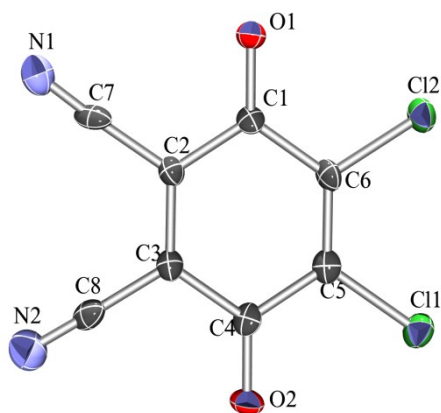

**Figure S2** ORTEP-3 drawing of DDQ anion in **4**. Displacement ellipsoids are drawn for the probability of 50 %.

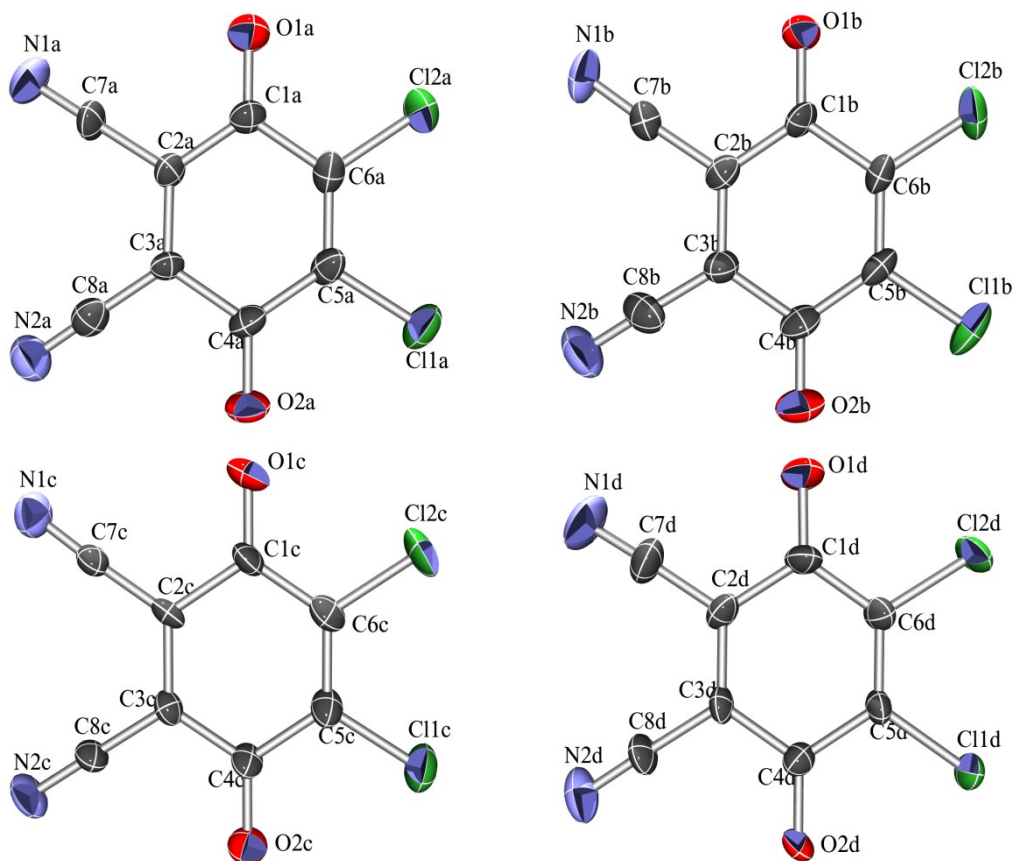

**Figure S3** ORTEP-3 drawings of four symmetry-independent DDQ anions in **5** (labelled as a, b, c and d). Displacement ellipsoids are drawn for the probability of 50 %.

## S2 Details on metal coordinations

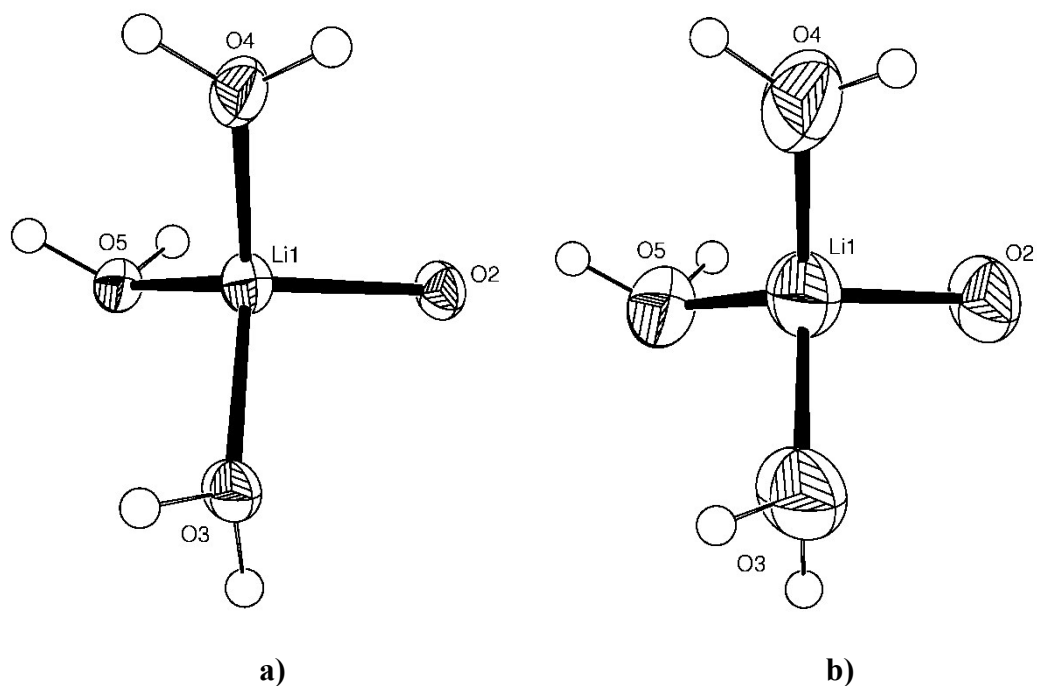

**Figure S4** ORTEP-3 drawings of Li coordination spheres in **1** at a) 120 K and b) room temperature. Displacement ellipsoids are drawn for the probability of 50 % and hydrogen atoms are shown as spheres of arbitrary radii.

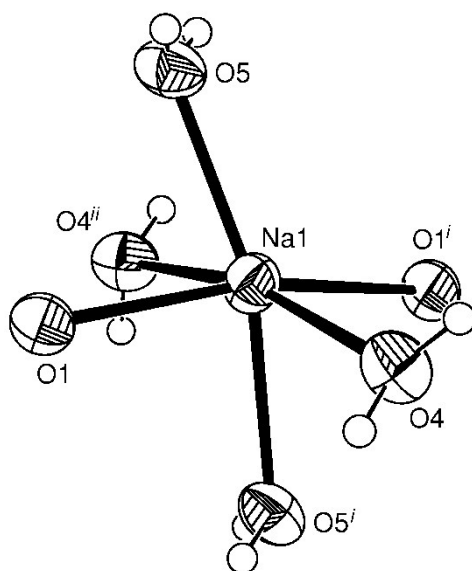

**Figure S5** ORTEP-3 drawing of Na coordination sphere in **2**. Displacement ellipsoids are drawn for the probability of 50 % and hydrogen atoms are shown as spheres of arbitrary radii. Symmetry operators *i*)  $3/2-x, 1/2+y, 1/2-z$ ; *ii*)  $3/2-x, -1/2+y, 1/2-z$ .

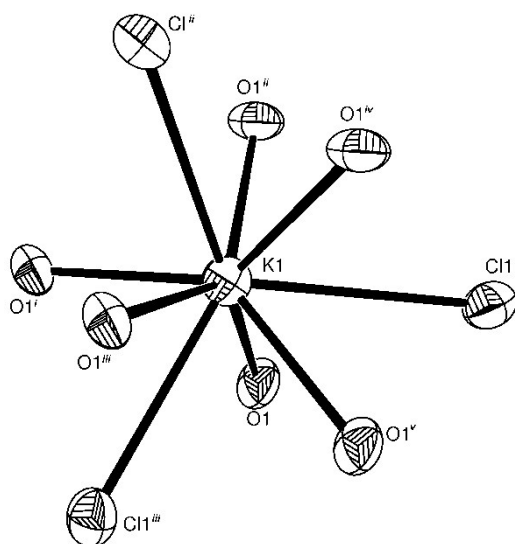

**Figure S6** ORTEP-3 drawing of K1 coordination sphere in **3**. Displacement ellipsoids are drawn for the probability of 50 %. Symmetry operators: *i*)  $1-x+y, 1-x, z$ ; *ii*)  $1-y, x-y, z$ ; *iii*)  $1-x+y, 1-x, 1+z$ ; *iv*)  $1-y, x-y, 1+z$ ; *v*)  $x, y, 1+z$ .

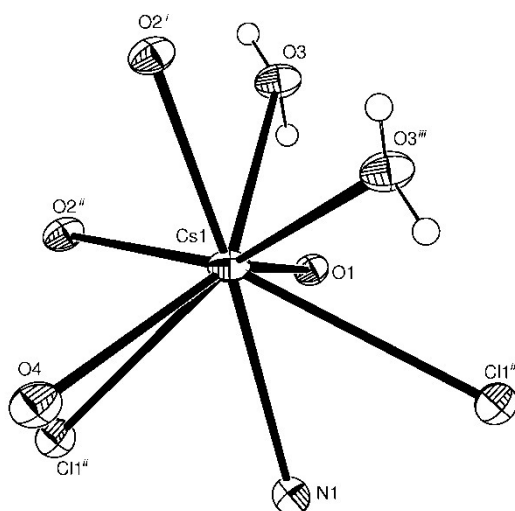

**Figure S7** ORTEP-3 drawing of Cs1 coordination sphere in **4**. Displacement ellipsoids are drawn for the probability of 50 % and hydrogen atoms are shown as spheres of arbitrary radii. Symmetry operators: *i*)  $x, -1+y, z$ ; *ii*)  $1-x, 1-y, 2-z$ ; *iii*)  $-x, 2-y, 2-z$ .

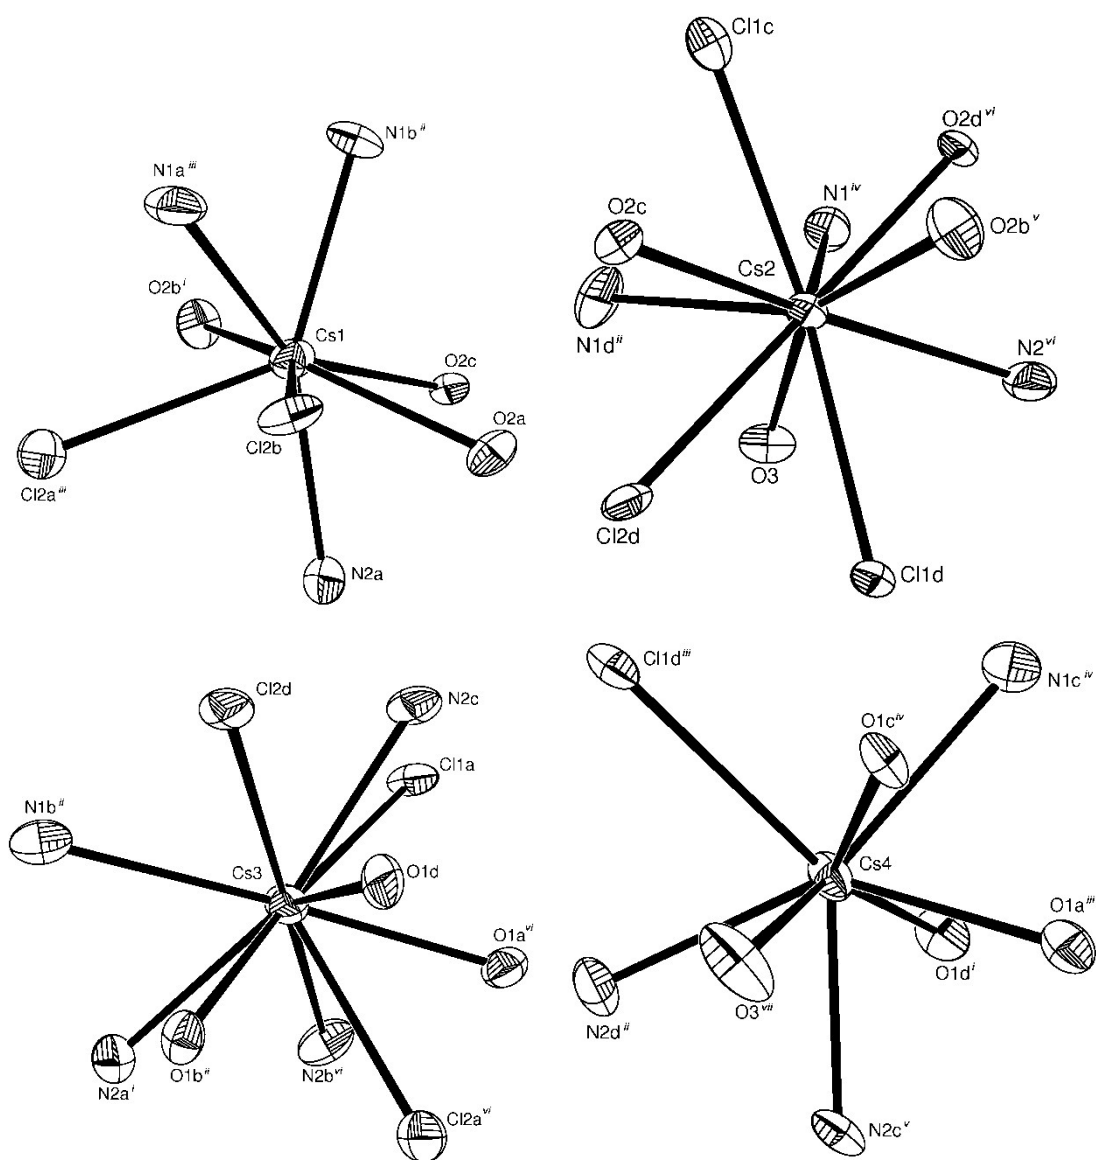

**Figure S8** ORTEP-3 drawings of coordination spheres of four symmetry-independent Cs ions in **5**. Displacement ellipsoids are drawn for the probability of 50. Symmetry operators: *i*)  $1-x, 1/2+y, z$ ; *ii*)  $1-x, -1/2+y, z$ ; *iii*)  $1-x, -y, -1/2+z$ ; *iv*)  $-x, 1/2+y, z$ ; *v*)  $1-x, 1/2+y, z$ ; *vi*)  $x, -y+1/2, z+1/2$ ; *vii*)  $-x, 1/2+y, z$ .

### S3 Crystal packing of compounds 1-5

In **1** stacks of radical anions extend in the direction [100]. Lithium cation is in tetrahedral coordination, by O2 of DDQ and three water molecules (Fig. S4). These water molecules are donors of 7 symmetry-independent hydrogen bonds and acceptors of two; DDQ accepts five hydrogen bonds (Table S1). Overall, a 3D hydrogen bonding network is formed (Fig. S9).

Sodium cation in **2** has a distorted octahedral coordination (Fig. S5) by O1 of DDQ and two water molecules; two symmetry-equivalent halves of the coordination sphere are related by a  $2_1$  axis. Ligands bridge the sodium ions forming chains parallel to [010]; DDQ anions from neighbouring chains form  $\pi$ -interaction, so the stacks are also parallel to [010] (Fig. S10). There are four symmetry-inequivalent hydrogen bonds (Table S1): donors are water molecules and acceptors are O2 from DDQ, O3 from MeCOEt (both accepting two hydrogen bonds), forming layers parallel to  $(10\bar{1})$ .

DDQ anion in **3** has a crystallographic symmetry  $C_s$ , so two symmetry-independent K cations are located in special positions: K1 on a  $C_3$  axis (p.p. 0.33) and K2 in an intersection of three  $m$  planes (p.p. 0.17), therefore asymmetric unit comprises a half of a DDQ anion, a half of a K cation and a half of a water molecule. K1 is coordinated by 6 O1 atoms and 3 Cl1 atoms of DDQ (Fig. S6); O1 acts as a bridging ligand, forming a 3D motive (Fig. S11). K2 occupies a cavity, so its only close contacts are 4 water molecules (O4, distance 3.56 Å) and 2 symmetry-equivalent K2 (distance 3.55 Å). A single symmetry-inequivalent hydrogen bond links the water molecule and N1 of DDQ (Table S1), forming a cyclic motive  $R_2^2(27)$  around the K2. Anions form stacks parallel to [001].

Asymmetric unit of **4** comprises a Cs cation, a DDQ anion, a water molecule and a molecule of MeCOEt. The cation is octacoordinated, by O1 and N1 from DDQ, three O2 atoms from three symmetry-equivalent DDQs, two symmetry equivalent water molecules (O3) and a MeCOEt (O4) (Fig. S7). O2 and O3 act as bridging ligands. Two symmetry-independent hydrogen bonds are present (Table S1): the water molecule is a donor, while the acceptors are O1 (DDQ) and O4 (MeCOEt). Anions and cations form layers parallel to [001]; between them are MeCOEt molecules, so the layers are held together by dispersion interactions (Fig. S12). Stacks also extend in the direction [001].

**5** crystallises with  $Z' = 4$ , that is four formula units per asymmetric unit, i.e.  $Cs_4DDQ_4 \cdot H_2O$ . The cations and anions form a 3D network (Fig. S13) with stacks of DDQ

anions extending in the direction [100]. The water molecule (O3) probably acts as a proton donor, but since hydrogen atoms could not be reliably located, existence of hydrogen bonds can not be determined.

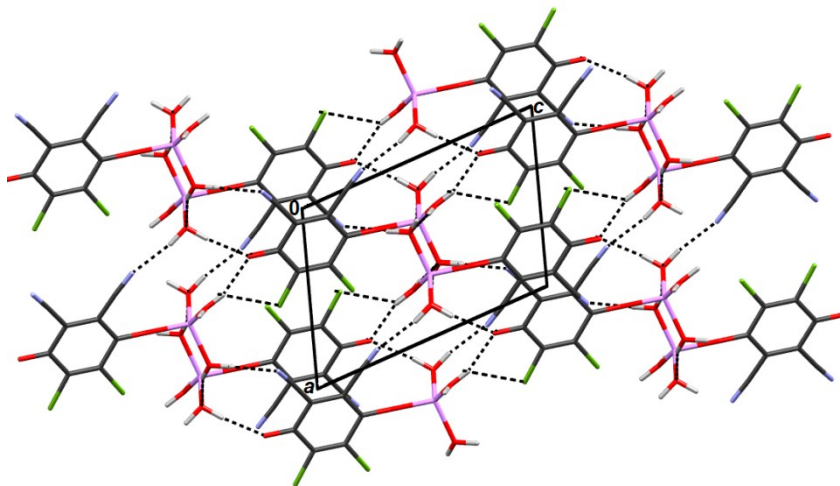

**Figure S9** Crystal packing of **1** viewed in the direction [100].

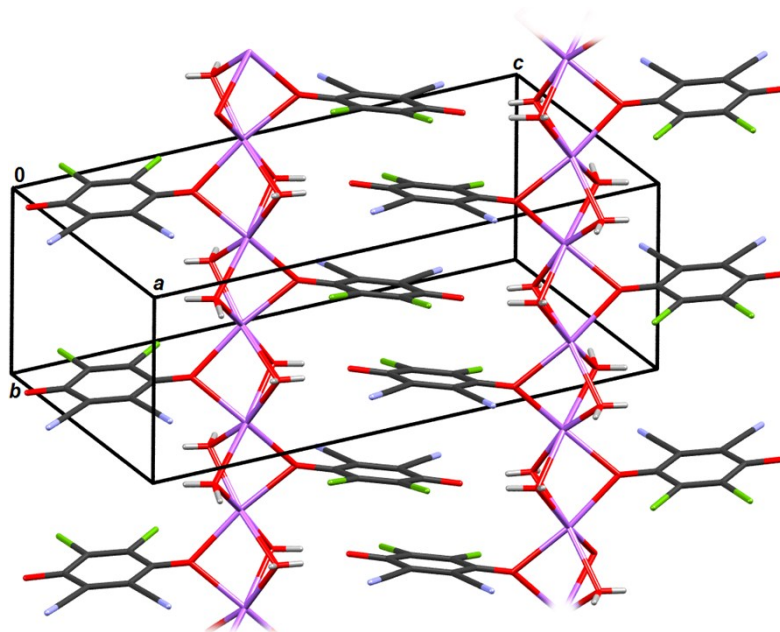

**Figure S10** Sodium-ligand chains and  $\pi$ -stacks in **2** parallel to [010]. This motive also forms layers parallel to (10-1).

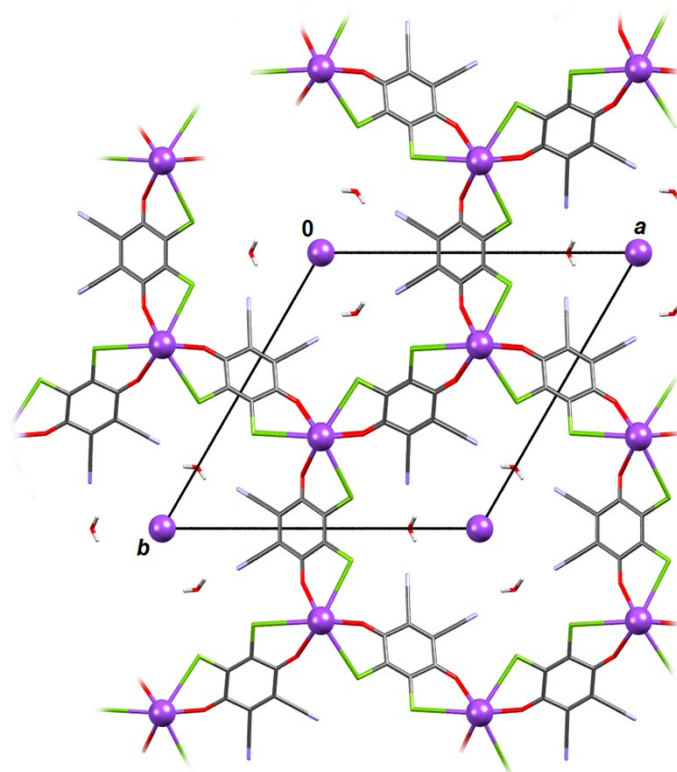

**Figure S11** 3D packing of **3**. There are two symmetry independent potassium cations with the two distinctive structural roles: connecting three radical anions (K1) forming a hexameric units with bridged radical anions generating a cavity occupied by K2. K atoms are shown as spheres of arbitrary radii.

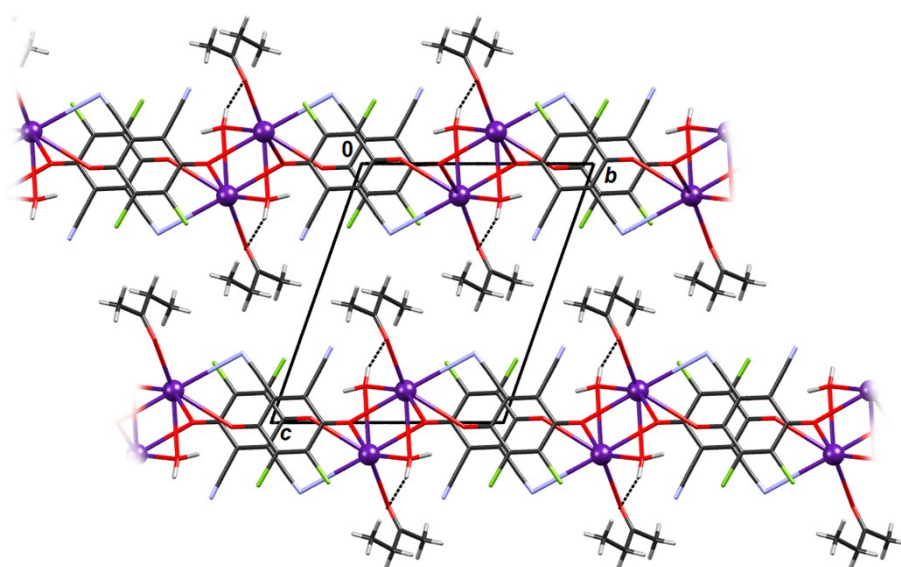

**Figure S12** Layered structure of **4**: cation and anions form layers parallel to [001], and in between there are only dispersion interactions.



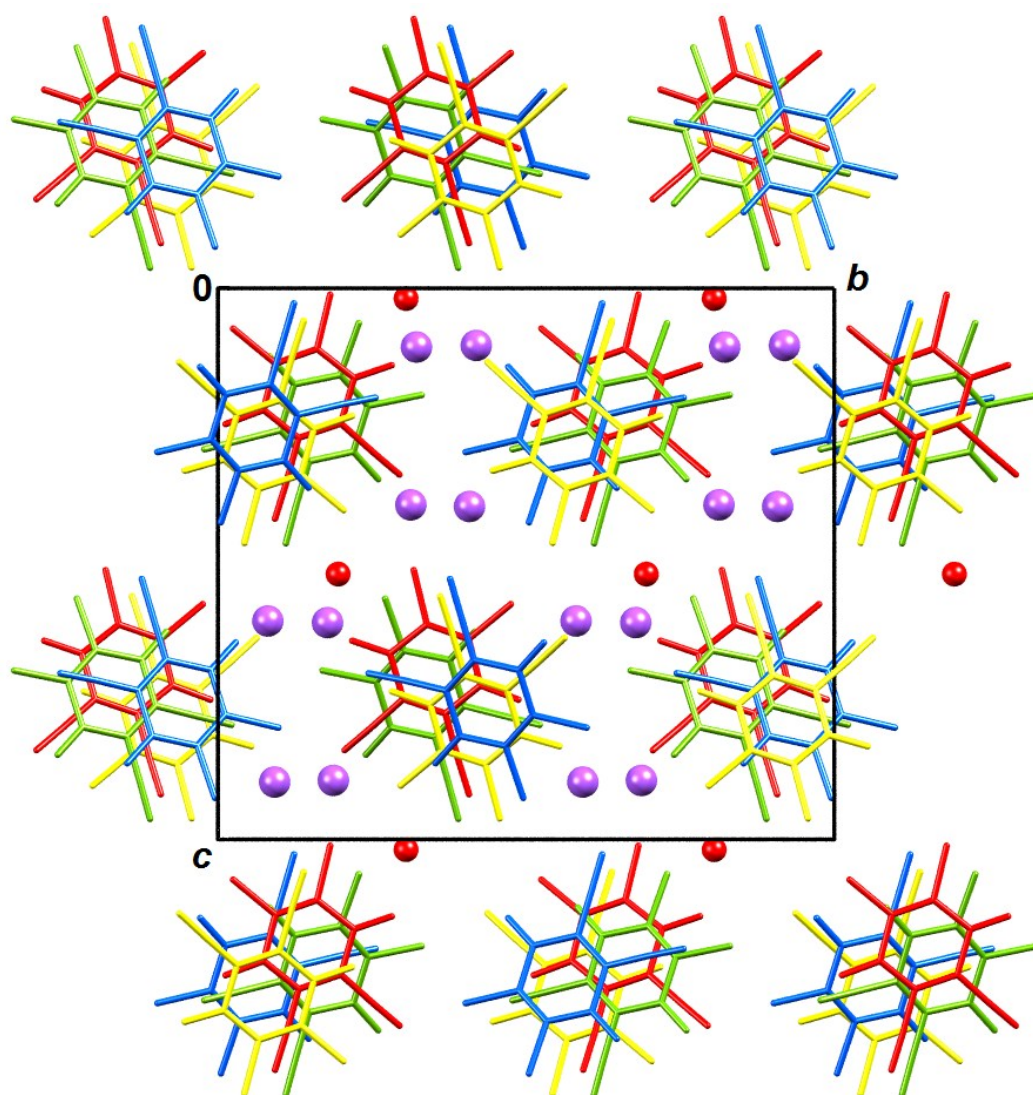

**Figure S13** Crystal packing of **5** comprising four molecules in an asymmetric unit (colour-coded: A is red, B is blue, C is yellow and D is green) viewed in the direction [100]. Cs cations and water molecules are shown as purple and red spheres of arbitrary radii.

**Table S1** Geometric parameters of hydrogen bonds.

|                      | $D-H / \text{\AA}$ | $H \cdots A / \text{\AA}$ | $D \cdots A / \text{\AA}$ | $D-H \cdots A / ^\circ$ | Symm. op. on $A$               |
|----------------------|--------------------|---------------------------|---------------------------|-------------------------|--------------------------------|
| <b>1, 120 K</b>      |                    |                           |                           |                         |                                |
| O3–H3A $\cdots$ O5   | 0.92(2)            | 1.98(2)                   | 2.874(2)                  | 163(3)                  | 1– $x$ , 1– $y$ , 1– $z$       |
| O3–H3B $\cdots$ N1   | 0.92(2)            | 2.02(2)                   | 2.902(2)                  | 162(3)                  | –1+ $x$ , –1+ $y$ , –1+ $z$    |
| O4–H4A $\cdots$ Cl2  | 0.90(3)            | 2.75(2)                   | 3.313(2)                  | 122(3)                  | $x$ , $y$ , –1+ $z$            |
| O4–H4A $\cdots$ O1   | 0.90(3)            | 1.97(3)                   | 2.832(2)                  | 162(3)                  | $x$ , $y$ , –1+ $z$            |
| O4–H4B $\cdots$ O3   | 0.94(3)            | 1.98(4)                   | 2.905(2)                  | 172(3)                  | 1– $x$ , 2– $y$ , 1– $z$       |
| O5–H5A $\cdots$ O1   | 0.92(2)            | 2.00(2)                   | 2.910(2)                  | 170(2)                  | 2– $x$ , 2– $y$ , 2– $z$       |
| O5–H5B $\cdots$ N2   | 0.92(3)            | 2.01(2)                   | 2.924(2)                  | 170(3)                  | 2– $x$ , 2– $y$ , 2– $z$       |
| <b>1, RT</b>         |                    |                           |                           |                         |                                |
| O3–H3A $\cdots$ O5   | 0.95(3)            | 2.02(4)                   | 2.915(3)                  | 158(5)                  | 1– $x$ , 1– $y$ , 1– $z$       |
| O3–H3B $\cdots$ N1   | 0.94(2)            | 2.00(2)                   | 2.925(3)                  | 170(4)                  | –1+ $x$ , –1+ $y$ , –1+ $z$    |
| O4–H4A $\cdots$ Cl2  | 0.93(4)            | 2.79(4)                   | 3.342(2)                  | 119(3)                  | $x$ , $y$ , –1+ $z$            |
| O4–H4A $\cdots$ O1   | 0.93(4)            | 1.94(5)                   | 2.841(4)                  | 164(4)                  | $x$ , $y$ , –1+ $z$            |
| O4–H4B $\cdots$ O3   | 0.94(6)            | 2.04(5)                   | 2.955(4)                  | 166(5)                  | 1– $x$ , 2– $y$ , 1– $z$       |
| O5–H5A $\cdots$ O1   | 0.94(4)            | 2.01(3)                   | 2.947(3)                  | 173(4)                  | 2– $x$ , 2– $y$ , 2– $z$       |
| O5–H5B $\cdots$ N2   | 0.94(4)            | 2.03(4)                   | 2.954(4)                  | 174(4)                  | 2– $x$ , 2– $y$ , 2– $z$       |
| <b>2</b>             |                    |                           |                           |                         |                                |
| O4–H4A $\cdots$ O3   | 0.95(3)            | 1.95(3)                   | 2.830(5)                  | 154(3)                  | $x$ , 1+ $y$ , $z$             |
| O4–H4B $\cdots$ O2   | 0.94(3)            | 2.10(5)                   | 2.870(4)                  | 138(4)                  | 1– $x$ , 2– $y$ , – $z$        |
| O5–H5A $\cdots$ O3   | 0.71(5)            | 2.22(6)                   | 2.885(5)                  | 157(6)                  | $x$ , $y$ , $z$                |
| O5–H5B $\cdots$ O2   | 0.81(6)            | 2.17(6)                   | 2.888(4)                  | 148(6)                  | 1/2+ $x$ , 3/2– $y$ , 1/2+ $z$ |
| <b>3</b>             |                    |                           |                           |                         |                                |
| O4–H4 $\cdots$ N1    | 0.95(11)           | 2.04(11)                  | 2.857(14)                 | 144(7)                  | $x$ , $y$ , $z$                |
| <b>4</b>             |                    |                           |                           |                         |                                |
| O3–H3A $\cdots$ O1   | 0.95(7)            | 2.01(8)                   | 2.897(6)                  | 155(7)                  | $x$ , $y$ , $z$                |
| O3–H3B $\cdots$ O4   | 0.94(7)            | 1.95(8)                   | 2.852(6)                  | 161(9)                  | – $x$ , 1– $y$ , 2– $z$        |
| C11–H11B $\cdots$ N1 | 0.97               | 2.61                      | 3.515(9)                  | 155                     | – $x$ , 1– $y$ , 1– $z$        |
